# Supplementary material
Source: PubMed Central journal article supplement (PMC3411961)
Supplement: 1206573109_pnas.201206573SI.pdf [file 1206573109_pnas.201206573SI.pdf]

# Supporting Information

Sun et al. 10.1073/pnas.1206573109

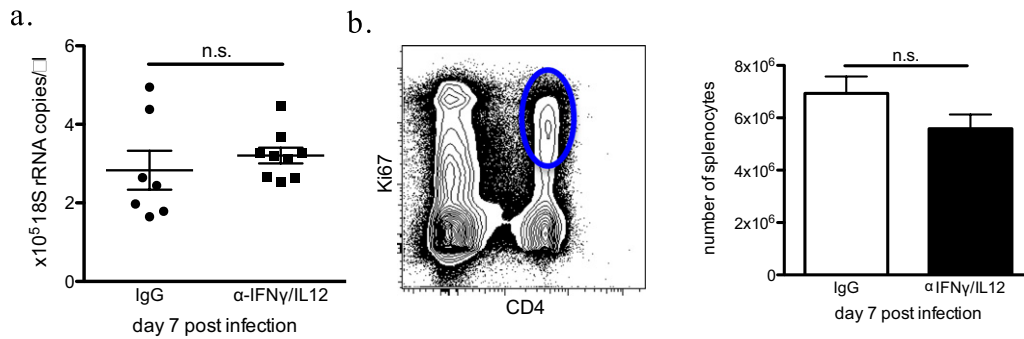

**Fig. S1.** Parasitemia and CD4 T-cell responses in anti-IFN- $\gamma$ /IL-12- and control IgG-treated mice. (A) Control IgG- and anti-IFN- $\gamma$ /IL-12-treated mice had comparable parasitemias as detected by quantitative PCR for *Plasmodium berghei* 18S rRNA copies.  $n = 7-9$  animals per group. Data are shown as mean  $\pm$  SEM. (B) Proliferation was used as a surrogate for *P. berghei*-responsive CD4 T cells. *P. berghei* ANKA (PbA)-responsive CD4 T cells were identified as Ki67<sup>+</sup>, CD4<sup>+</sup> cells (Left). The control IgG- and  $\alpha$ IFN- $\gamma$ /IL-12-treated mice had comparable numbers of PbA-responsive CD4 T cells (Right). Data are representative of two independent experiments and are shown as mean  $\pm$  SEM.  $n = 4-5$  animals per group.

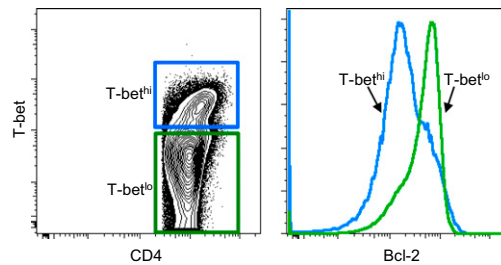

**Fig. S2.** Bcl-2 expression by CD4 T cells. The level of Bcl-2 was decreased in splenic CD4 T cells that express high versus low levels of T-bet on day 5 post PbA infection, as determined by flow cytometry.

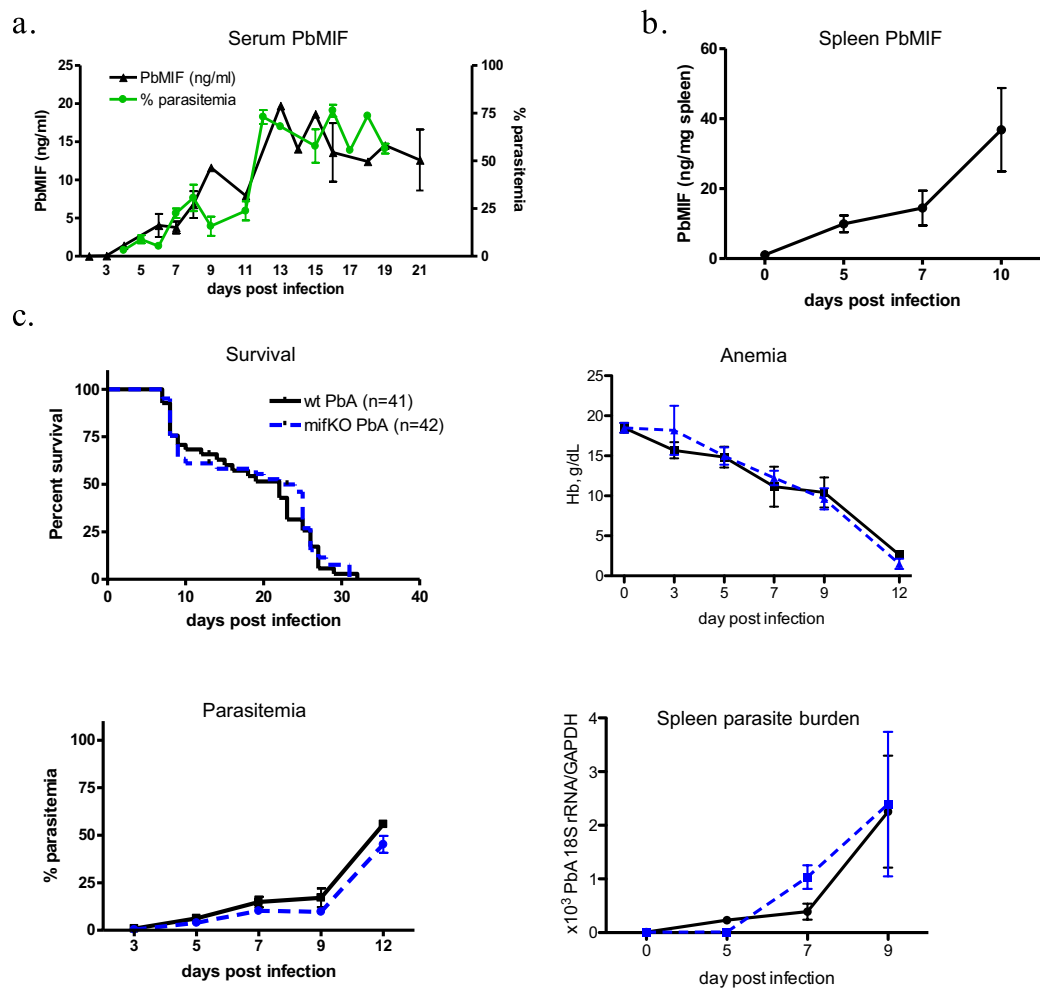

**Fig. S3.** Detection of *Plasmodium*-encoded macrophage migration inhibitory factor (PMIF) and clinical course of WT PbA and PbA with a genetic deletion in *P. berghei* macrophage migration inhibitory factor (*mif*KO PbA) infection. (A) Serum levels of PbMIF were measured by ELISA (black) and plotted with parasitemia (green), which was determined by counting at least 400 red blood cells (RBCs) on a thin blood smear.  $n = 4$  mice per group. (B) PbMIF also was detected in spleen lysates by ELISA.  $n = 4$  mice per group. (C) (Upper Left) Survival of BALB/c mice after i.p. injection of  $10^6$  WT PbA- or *mif*KO PbA-infected RBCs,  $n = 41$  or 42 mice. (Upper Right) Anemia was assessed by measuring hemoglobin levels of mice infected with blood-stage WT PbA or *mif*KO PbA. At the indicated days post infection, 5  $\mu$ L tail vein blood was collected and diluted in Drabkin's solution, and optical density was determined. Data are representative of three independent experiments.  $n = 4$  mice per group. (Lower Left) Peripheral blood parasitemia was measured by counting at least 400 RBCs on a thin blood smear to determine numbers of infected RBCs relative to total RBCs. (Lower Right) Spleen parasite burden was determined by real-time PCR analysis of the expression of PbA 18S rRNA relative to mouse GAPDH in spleen homogenates at indicated days post infection. Data are shown as mean  $\pm$  SEM and are representative of three independent experiments for anemia and blood and spleen parasitemia measurements.  $n = 4$  mice per group.

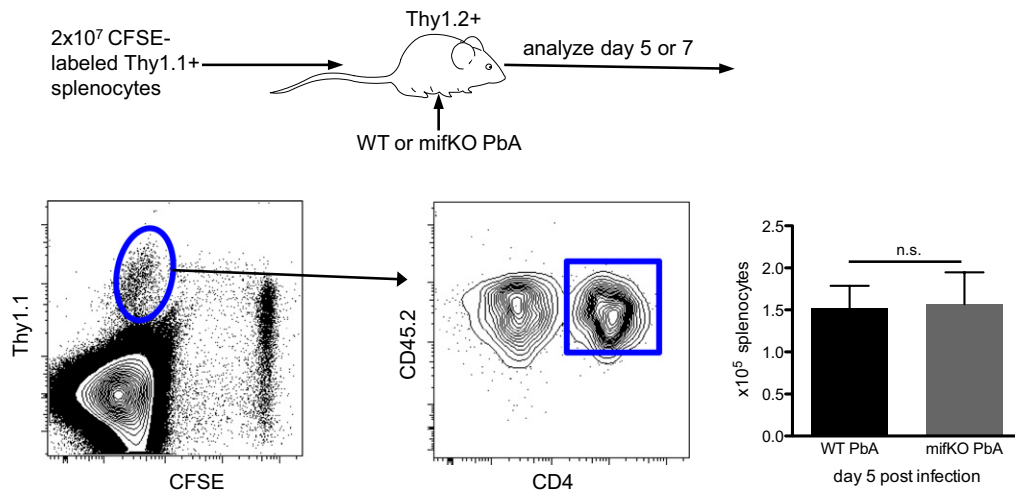

**Fig. 54.** Detecting PbA-responsive CD4 T cells during WT PbA or miKO PbA infection. Thy1.1<sup>+</sup> BALB/c splenocytes ( $2 \times 10^7$ ) were labeled with 5  $\mu$ M carboxyfluorescein succinimidyl ester (CFSE) and transferred i.v. on the day of infection. PbA-responsive CD4 T cells were identified as CFSE<sup>lo</sup>, Thy1.1<sup>+</sup>, CD4<sup>+</sup> cells in intracellular cytokine-staining experiments during which splenocytes were cocultured ex vivo with antigen-presenting cells (APCs) and infected RBC lysates. The PbA-responsive CD4 T cells from the infected host were further identified as CD45.2<sup>+</sup> (Left). At day 5 post infection, WT PbA- and mifKO PbA-infected mice had similar numbers of PbA-responsive CD4 T cells, identified here as CFSE<sup>lo</sup>, Thy1.1<sup>+</sup>, CD4<sup>+</sup> splenocytes (Right). Data are shown as mean  $\pm$  SEM and are representative of six independent experiments.  $n = 3-5$  mice per group.

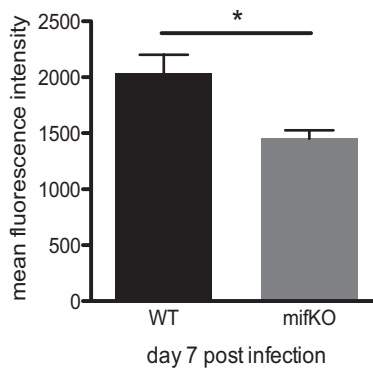

**Fig. 55.** Production of IFN- $\gamma$  by CD4 T cells is increased in the presence of PMIF. IFN- $\gamma$  production by malaria-responding CD4 T cells (CFSE<sup>lo</sup>, Thy1.1<sup>+</sup>, CD4<sup>+</sup>) was increased at day 7 post infection in WT PbA- compared with mifKO PbA-infected mice, shown as mean fluorescence intensity. Data are representative of three independent experiments.  $n = 4$  mice per group. \* $P < 0.05$  by two-tailed  $t$  test.

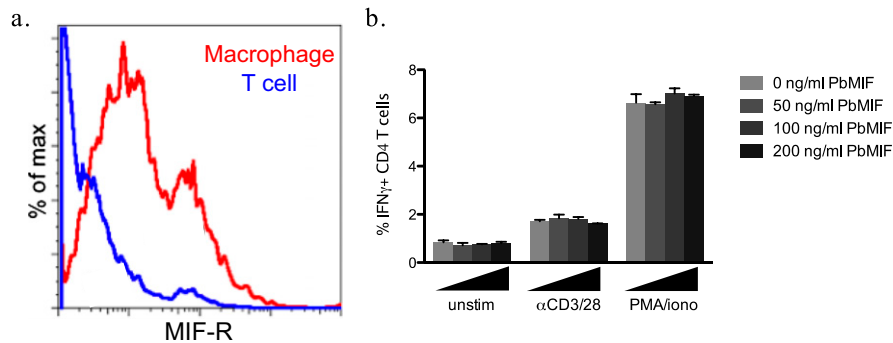

**Fig. 56.** PMIF signals through the host macrophage migration inhibitory factor receptor (MIF-R) on activated antigen presenting cells (APCs). (A) Expression of the MIF-R (also known as "CD74") on macrophages (F4/80<sup>+</sup>) compared with CD4<sup>+</sup> T cells isolated from the spleen of naive BALB/c mice. (B) CD4 T cells from naive BALB/c mice were isolated by magnetic separation, and  $10^6$  CD4 T cells were cultured with increasing concentrations of PbMIF and no other stimulation (unstim), with a 1:1 ratio of anti-CD3/28 beads for 18 h ( $\alpha$ CD3/28), or with 50 ng/mL phorbol 12-myristate 13-acetate and 1  $\mu$ g/mL ionomycin (PMA/iono) for 5 h. Brefeldin A (1  $\mu$ g/mL) was added to all conditions for the last 3 h, and IFN- $\gamma$  production was detected by intracellular cytokine staining. Data are shown as mean  $\pm$  SEM.



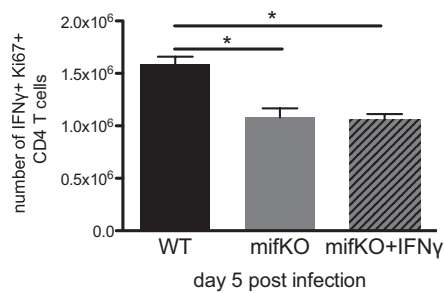

**Fig. S9.** Administration of IFN- $\gamma$  does not alter IFN- $\gamma$  production by responding CD4 T cells. Ten micrograms IFN- $\gamma$  or PBS were injected i.p. on days 0, 2, and 4 post infection. Mice were killed on day 5 post infection, and intracellular cytokine staining for IFN- $\gamma$  was performed after 3 h of ex vivo stimulation with PMA and ionomycin in the presence of Brefeldin A. Numbers of IFN- $\gamma$ -producing Ki67<sup>+</sup> CD4<sup>+</sup> (PbA-responsive) splenocytes were determined. Data are shown as mean  $\pm$  SEM and are representative of two independent experiments. \* $P < 0.05$  by two-tailed  $t$  test.  $n = 4$  animals per group.
